# Supplementary material
Source: PubMed Central journal article supplement (PMC3099132)

# Supplemental Figure 1

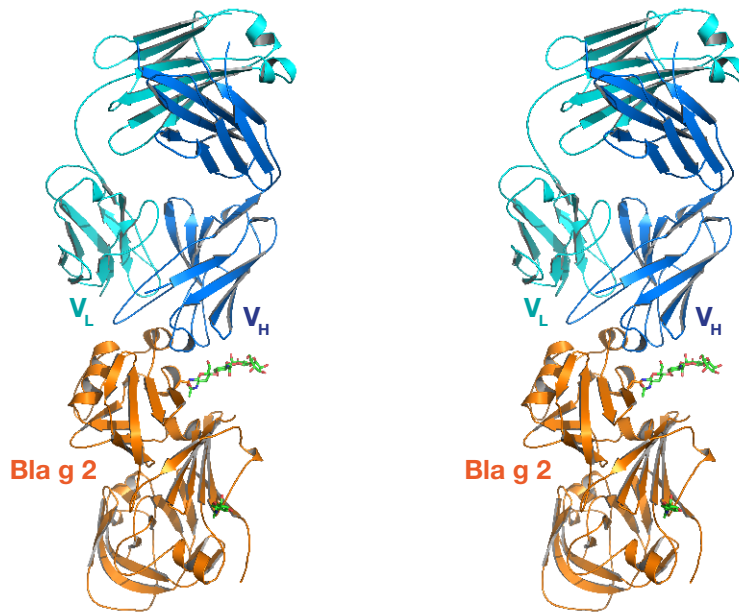

Supplemental Figure 2

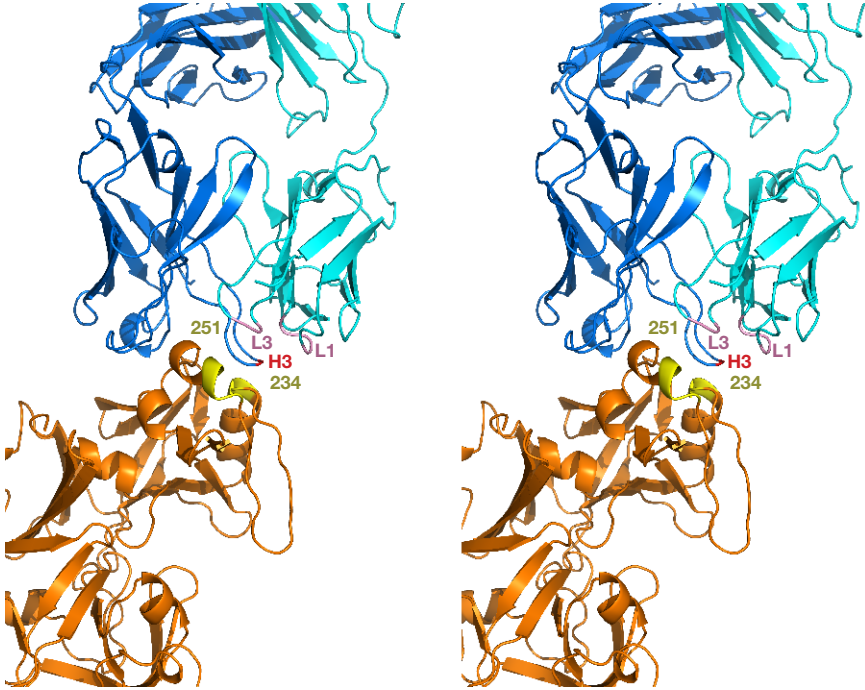

# Supplemental Figure 3

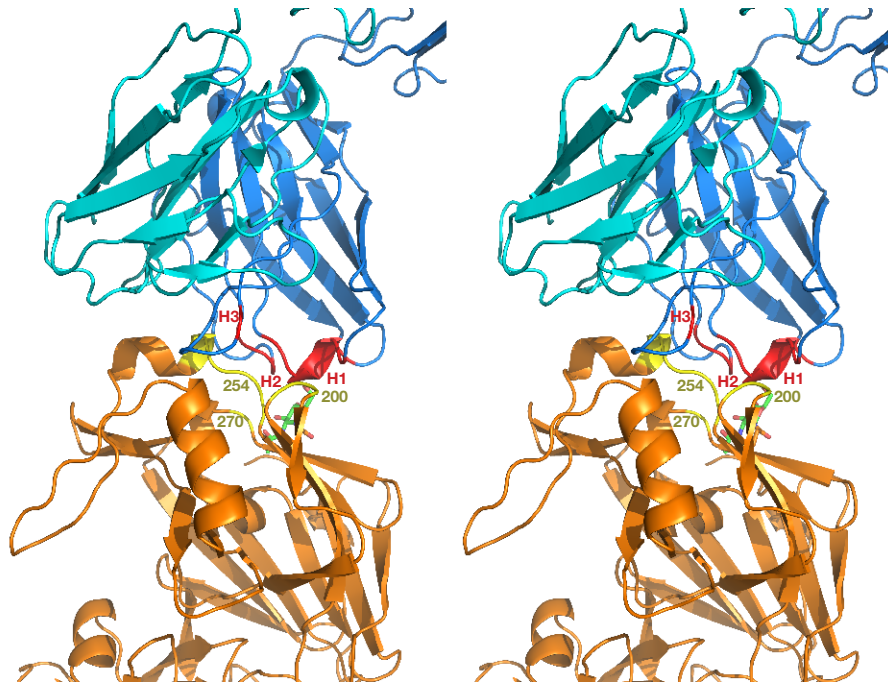

# Supplemental Figure 4

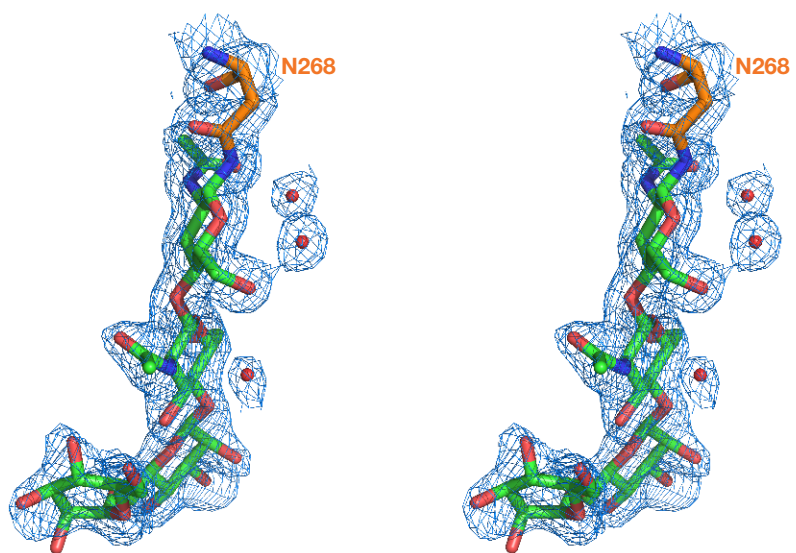

# Supplemental Figure 5

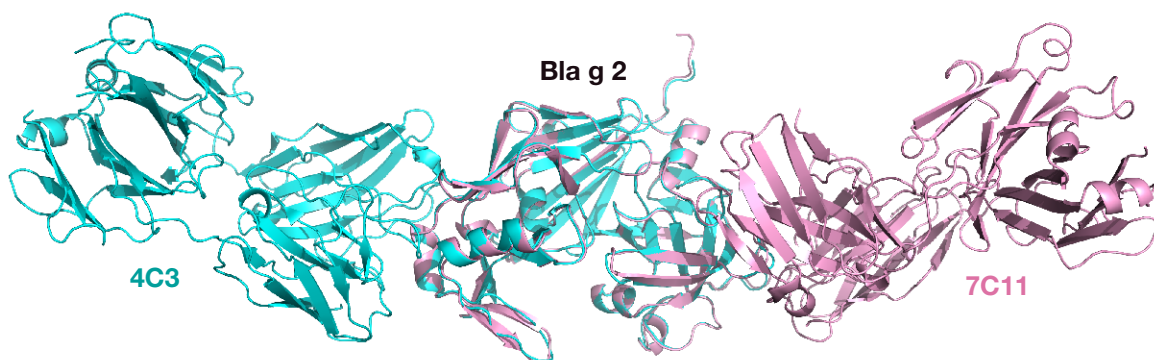

Supplement: NIHMS289164-supplement-Supplementary_figures.pdf [file NIHMS289164-supplement-Supplementary_figures.pdf]
